# Supplementary material for: High-performance cationic polyrotaxanes terminated with polypeptides as promising nucleic acid delivery systems
Source: Royal Society of Chemistry journal article supplement (doi:10.1039/c8py00333e), 2018-01-01
Supplement: c8py00333e1.pdf [file c8py00333e1.pdf]

## Supporting Information

### High-performance cationic polyrotaxanes terminated with polypeptides as promising nucleic acid delivery systems

Hai-Qing Song,<sup>a,#</sup> Yu Qi,<sup>a,#</sup> Rui-Quan Li,<sup>a</sup> Gang Cheng,<sup>b</sup> Nana Zhao,<sup>a,\*</sup> and Fu-Jian Xu<sup>a,\*</sup>

<sup>a</sup>State Key Laboratory of Chemical Resource Engineering, Key Laboratory of Carbon Fiber and Functional Polymers (Beijing University of Chemical Technology), Ministry of Education, Beijing Laboratory of Biomedical Materials, and Beijing Advanced Innovation Center for Soft Matter Science and Engineering, Beijing University of Chemical Technology, Beijing 100029 China

<sup>b</sup>Department of Chemical Engineering, University of Illinois at Chicago, Chicago, IL 60607, United States

# Both authors contributed equally to this work.

\*To whom all correspondence should be addressed:

E-mail address: [xufj@mail.buct.edu.cn](mailto:xufj@mail.buct.edu.cn) (F J Xu)

[zhaonn@mail.buct.edu.cn](mailto:zhaonn@mail.buct.edu.cn) (N Zhao)

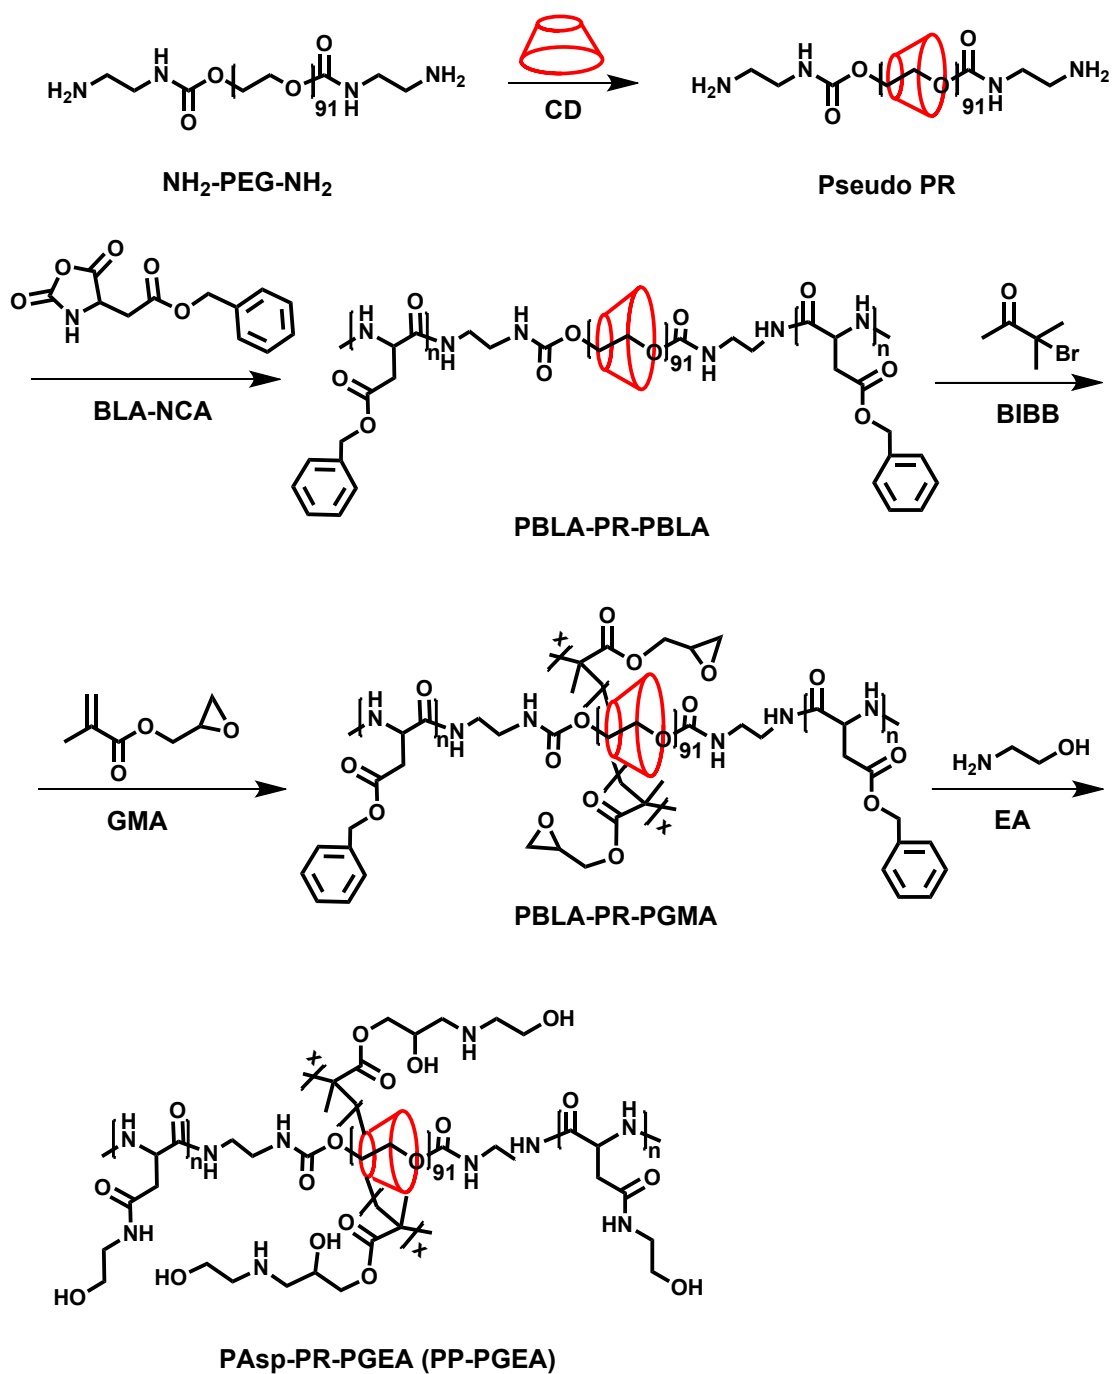

**Fig. S1.** Chemical scheme of the synthesis process of cationic polyrotaxanes PP-PGEA.

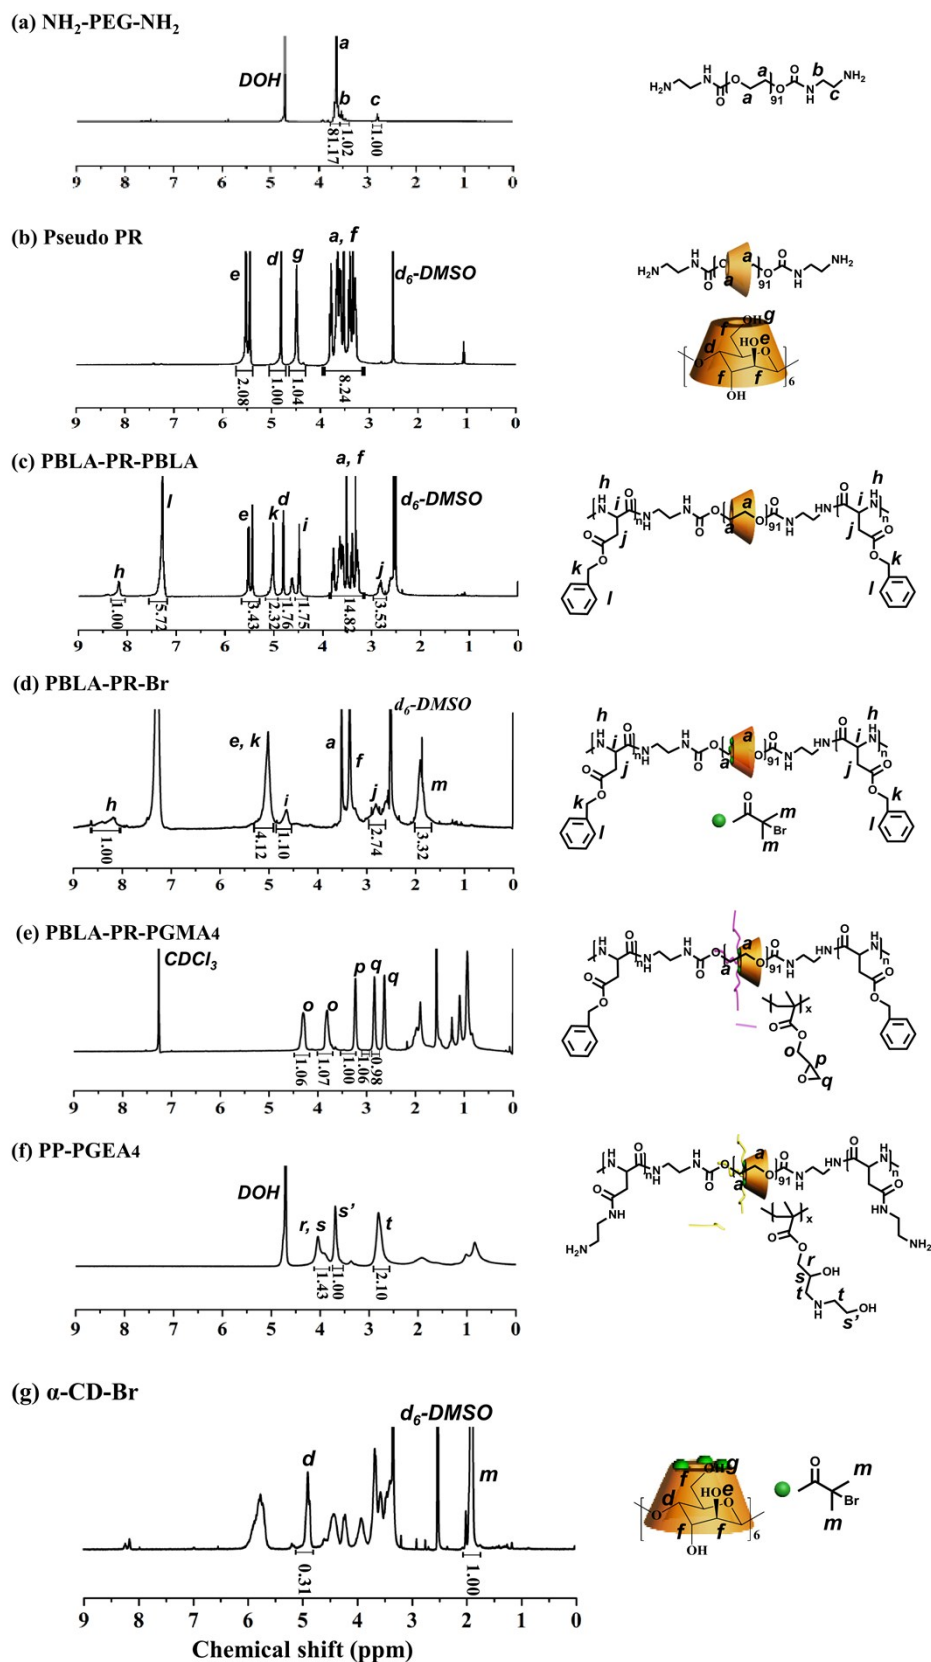

**Fig. S2.**  $^1\text{H}$  NMR spectra of (a)  $\text{NH}_2\text{-PEG-NH}_2$  in  $\text{D}_2\text{O}$ , (b) Pseudo PR in  $d_6\text{-DMSO}$ , (c) PBLA-PR-PBLA in  $d_6\text{-DMSO}$ , (d) PBLA-PR-Br in  $d_6\text{-DMSO}$ , (e) PBLA-PR-PGMA<sub>4</sub> in  $\text{CDCl}_3$ , (f) PP-PGEA<sub>4</sub> in  $\text{D}_2\text{O}$ , and (g)  $\alpha\text{-CD-Br}$  in  $d_6\text{-DMSO}$ .

The representative chemical structures of NH<sub>2</sub>-PEG-NH<sub>2</sub>, pseudo PR, PBLA-PR-PBLA, PBLA-PR-Br, PBLA-PR-PGMA<sub>4</sub>, PP-PGEA<sub>4</sub>, and α-CD-Br were characterized by <sup>1</sup>H NMR (Fig. S2). For NH<sub>2</sub>-PEG-NH<sub>2</sub> (Fig. S2(a)), the peak at δ = 3.6 ppm was associated with methylene protons of PEG (*a*, O-CH<sub>2</sub>-CH<sub>2</sub>). The peaks at 2.8 and 3.47 ppm were assigned to the protons of methylene adjacent to amide (*b*, CH<sub>2</sub>-NH-CO) and amino groups (*c*, CH<sub>2</sub>-NH<sub>2</sub>), respectively. For pseudo PR (Fig. S2(b)), the peaks at the scope of 5.46-5.53 ppm were associated with the hydroxyl protons adjacent to the methylidyne moieties (*e*, CH-OH) of glucose units. The peak at δ = 4.8 ppm was related to the unique methylidyne protons between the oxygen moieties (*d*, O-CH-O) of glucose. The chemical shift at δ = 4.5 ppm was mainly attributable to the hydroxyl protons adjacent to the methylene moieties (*g*, CH<sub>2</sub>-OH). The broad peaks at the scope of 3.20-3.84 ppm were attributed to the methylidyne and methylene protons (*f*, CH-O and CH<sub>2</sub>-O) of α-CD units and methylene protons (*a*, CH<sub>2</sub>-O) of PEG units. For PBLA-PR-PBLA (Fig. S2(c)), the signals at 4.59, 8.13, 2.85, and 5.08 ppm belonged to the protons of methylidyne adjacent to amide groups (*i*, CO-CH(CH<sub>2</sub>)-NH), protons of amide groups (*h*, CO-NH-CH), protons of methylene groups adjacent to methylidyne groups (*j*, CH-CH<sub>2</sub>-CO), and protons of methylene groups adjacent to phenyl groups (*k*, C<sub>6</sub>H<sub>5</sub>-CH<sub>2</sub>), respectively. The peak *d* at 4.81 ppm was attributed to the methylene protons of α-CD. Based on the characteristic peak areas of α-CD (peak *d*) and PEG (at 3.6 ppm, a+f-6d), the number of α-CD threaded onto PEG was about 23 after PEG were end-capped with PBLA chains.

For PBLA-PR-Br (Fig. S2(d)), the peak at δ = 1.99 ppm was associated with the methyl proton (*m*, OC-C(CH<sub>3</sub>)<sub>2</sub>-Br) of the 2-bromoisobutyryl groups. The substitution degree of the hydroxyl groups on the outside α-CD surface is determined to be about

3 from the area ratio of peak *m* and *e*. For PBLA-PR-PGMA (Fig. S2(e)), the signals at  $\delta = 3.8$  and  $\delta = 4.3$  ppm were attributed to methylene protons adjacent to oxygen moieties of the ester linkages (*o*,  $\text{CH}_2\text{OC}=\text{O}$ ). The peak at  $\delta = 3.2$  and peaks at  $\delta = 2.6$  and  $2.8$  ppm could be assigned to the methyldyne (*p*,  $\text{CH}_2\text{CH}(\text{O})\text{CH}_2$ ) and methylene (*q*,  $\text{CHCH}(\text{O})\text{CH}_2$ ) protons of the epoxy ring, respectively. The area ratio *o:p:q* was 2:1:2, which demonstrated that the epoxy groups in the PBLA-PR-PGMA<sub>4</sub> were not damaged throughout ATRP. After the ring-opening and aminolysis reactions of PBLA-PR-PGMA with excess EA, the peaks *o* and *p* which represented the epoxy groups of PBLA-PR-PGMA disappeared completely (Fig. S2(f)). The peaks *q* at 3.8 ppm and 4.3 ppm were combined into one peak *r* ( $\delta = 4.0$  ppm). The chemical shift of  $\delta = 3.6$  ppm mainly corresponded to the resultant methyldyne protons adjacent to the hydroxyl groups (*s*,  $\text{CHOH}$ ). The signal at 2.9 ppm was attributable to the methylene protons adjacent to the amine groups (*t*,  $\text{CH}(\text{OH})\text{CH}_2\text{NH}$ ). The <sup>1</sup>H NMR results indicated that PP-PGEA was prepared successfully. For the control  $\alpha$ -CD-Br, the substitution degree of the hydroxyl groups on the outside  $\alpha$ -CD surface is determined to be about 3 from the area ratio of peak *m* and *d* (Fig. S2(g)).
